# Supplementary material for: Improved voltammetric discrimination of acetaminophen and uric acid in urine using CoO biochar nanocomposite
Source: Royal Society of Chemistry journal article supplement (doi:10.1039/d4im00069b), 2024-07-18
Supplement: d4im00069b1.pdf [file d4im00069b1.pdf]

## Supplementary Information for

### Improved Voltammetric Discrimination of Acetaminophen and Uric Acid in Urine Using CoO Biochar Nanocomposite

Yihan Zhang,<sup>a</sup> Yiliyasi Baikeli,<sup>b</sup> Zehong Gao,<sup>a</sup> Xamxikamar Mamat<sup>a</sup> and Longyi Chen<sup>\*a</sup>

<sup>a</sup>Xinjiang Technical Institute of Physics and Chemistry, Chinese Academy of Sciences, Urumqi 830011, China. Email: [chenly@ms.xjb.ac.cn](mailto:chenly@ms.xjb.ac.cn)

<sup>b</sup>College of Chemistry and Chemical Engineering, Dezhou University, Dezhou 253023, China.

**Fig. S1** SEM image of CoO-FBC for clear view of the cracks in the cobalt oxide nanoplate.

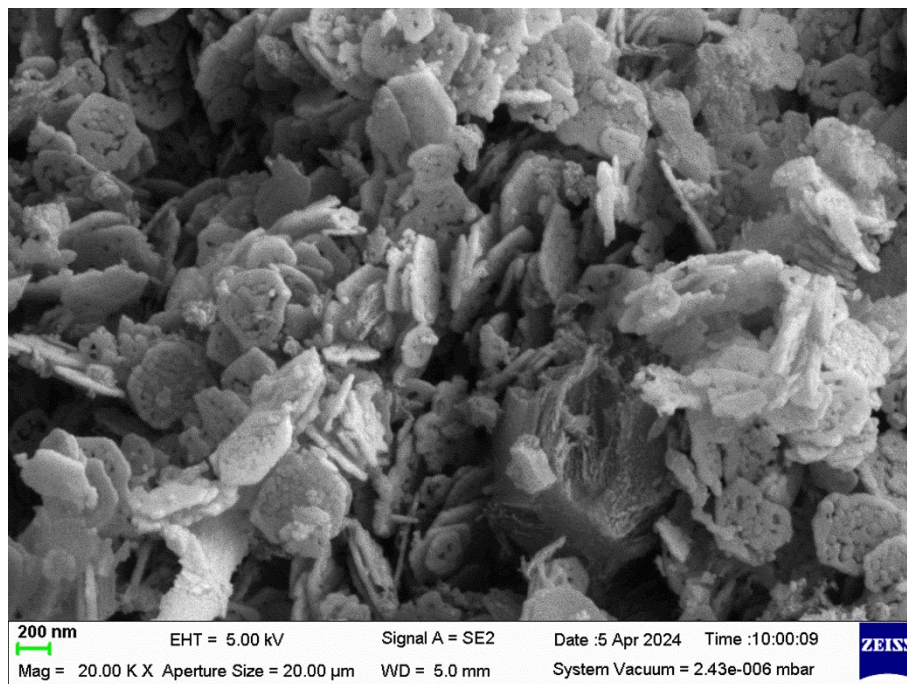

**Fig. S2** (a-d) SEM image, elemental mapping and EDS spectrum of BC, (b) carbon, (c) oxygen; (e-h) SEM image, elemental mapping and EDS spectrum of FBC, (f) carbon, (g) oxygen, (i) EDS spectrum of CoO-FBC.

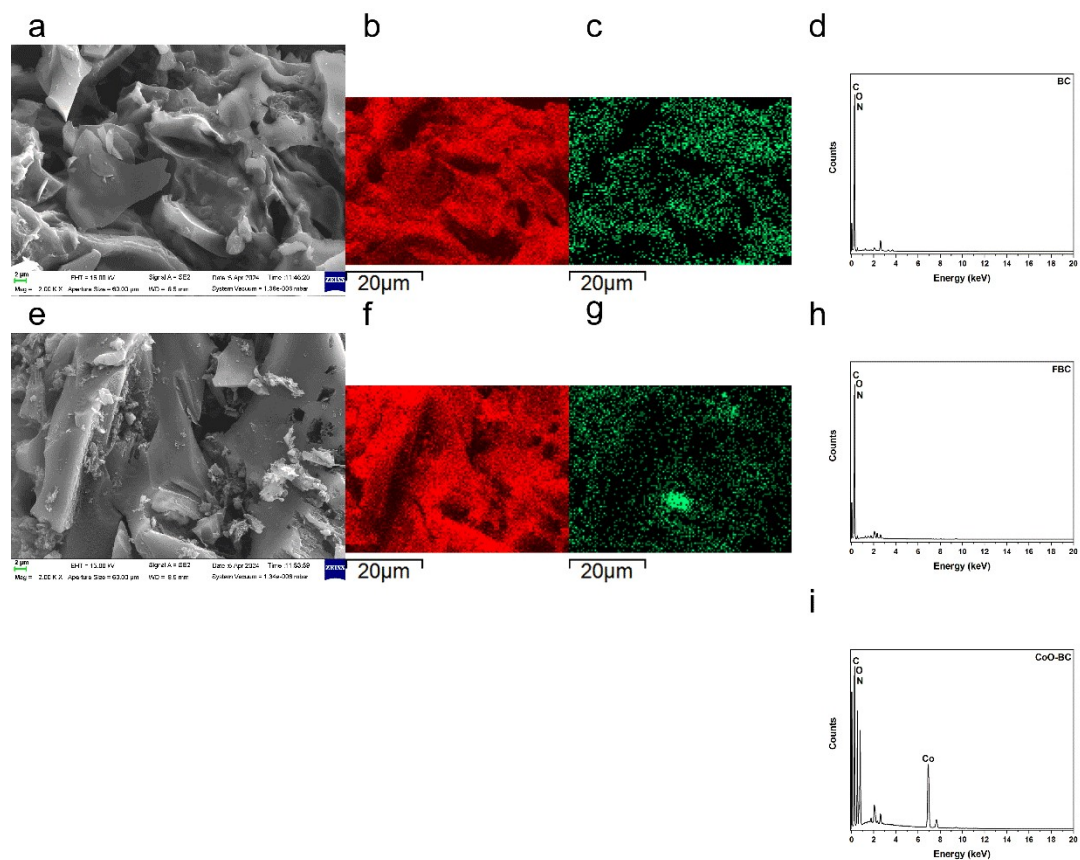

**Fig. S3** pore size distribution of the biomass carbon materials.

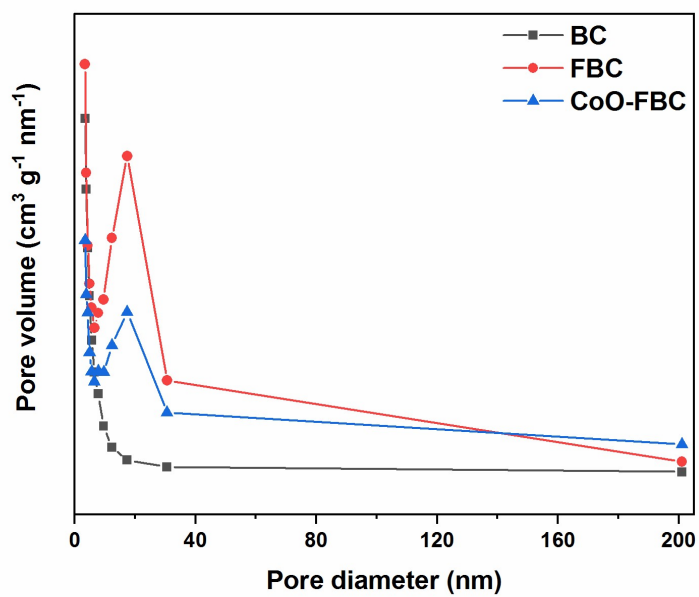

Fig. S4 Magnified view of the high frequency part.

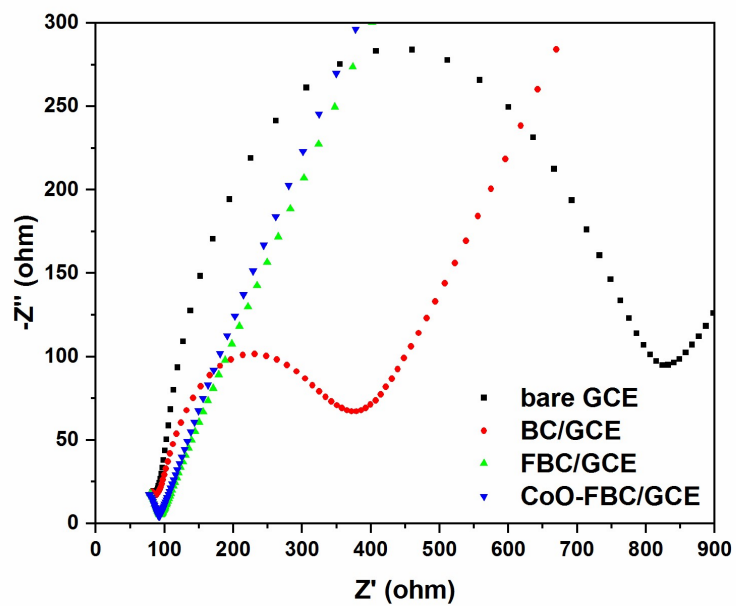

**Fig. S5** CV spectra of the bare GCE and biomass derived carbon electrocatalyst modified GCE in 0.1 M PBS solution, scan rate 50 mV s<sup>-1</sup>.

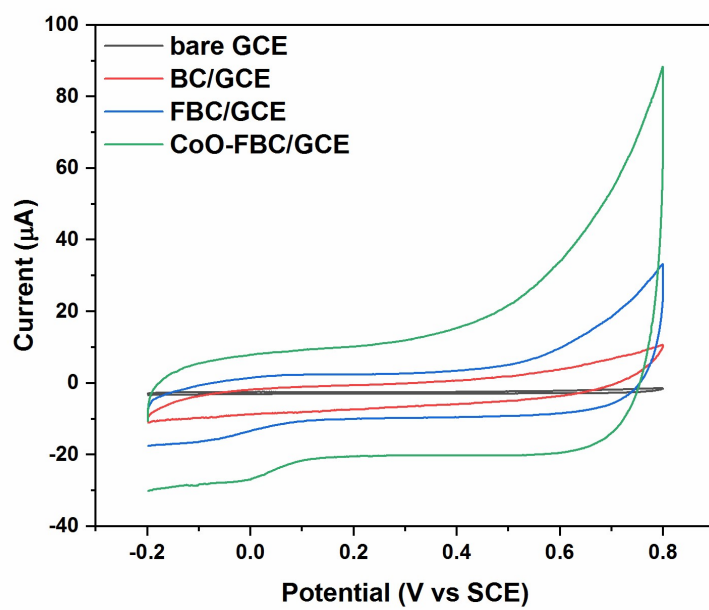

**Fig. S6** CoO-FBC/GCE was tested with continuing CV measurement for 10 cycles in APAP solution (500  $\mu\text{M}$  in 0.1 M PBS, scan rate 50  $\text{mV s}^{-1}$ ), the acetaminophen  $I_{\text{pa}}$  current remained about 82.1 % at the 10<sup>th</sup> cycle.

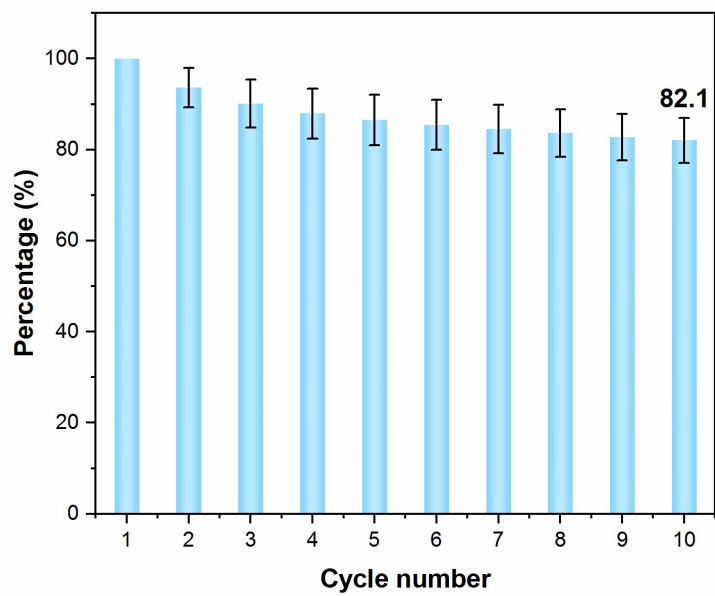

**Table S1** speculated calculation of the mass loss of CoO-FBC.

|                  | At 400 °C | At 700 °C | At 1000 °C |
|------------------|-----------|-----------|------------|
| FBC mass (%)     | 86.593    | 83.159    | 79.569     |
| CoO-FBC mass (%) | 94.436    | 88.079    | 71.507     |

Let's assume there is a 100 g of FBC, and a 100 g of CoO-FBC used in the TGA experiment.

Then the mass of CoO is 50 g, and the mass of FBC is 50 g.

The mole of  $\text{Co}_3\text{O}_4$  ( $\text{Co}^{2+}\text{OCo}_2^{3+}\text{O}_3$ ) is 0.208 mol (50 g divided by 240.797 g mol<sup>-1</sup>).

The reduction of CoO would lead to mass loss of the oxygen atom, about 3.328 g (0.208 mol multiplied by 15.999 g mol<sup>-1</sup>).

The reduction of  $\text{Co}_2\text{O}_3$  would lead to mass loss of the oxygen atom, about 9.984 g (0.208 mol multiplied by 3, and by 15.999 g mol<sup>-1</sup>).

For 100 g of FBC, the mass loss difference between 400 °C and 700 °C is 3.434 g.

For 100 g of CoO-FBC, the mass loss difference between 400 °C and 700 °C is 6.357 g.

The 3.434 g divided by 2.5 is 1.374 g, and 1.374 g plus 3.328 g is 4.702 g, which is close to 6.357 g.

For 100 g of FBC, the mass loss difference between 700 °C and 1000 °C is 3.590 g.

For 100 g of CoO-FBC, the mass loss difference between 700 °C and 1000 °C is 16.572 g.

The 3.590 g divided by 2.5 is 1.436 g, and 1.436 g plus 9.984 g is 11.42 g, which is close to 16.572 g.



**Table S2** elemental ratio measured from the XPS analysis.

| Element | BC               | FBC   | Co-FBC |
|---------|------------------|-------|--------|
|         | Atomic ratio (%) |       |        |
| Cl 2p   | 9.29             | 5.94  | 9.56   |
| C 1s    | 78.7             | 87.17 | 62.9   |
| N 1s    | 1.73             | 1.19  | 1      |
| O 1s    | 10.29            | 5.71  | 18.94  |
| Co 2p   |                  |       | 7.6    |
| Sum     | 100              | 100   | 100    |
